# Supplementary material
Source: MDPI journal article supplement (https://www.mdpi.com/2073-4395/13/3/848)
Supplement: s1 [file s1]

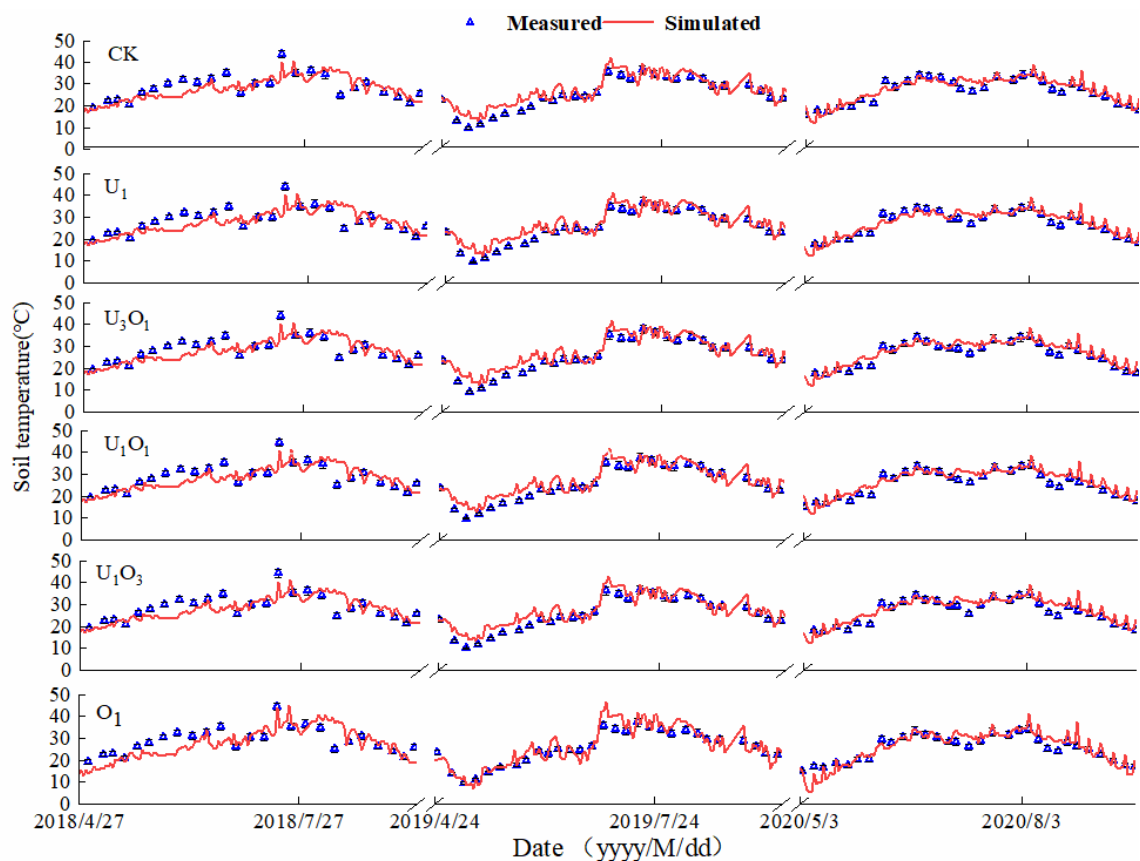

**Figure S1.** The modeled and measured soil temperature under different treatments. Bars are the standard deviation of the measured values.

Table S1 Statistical evaluation of model simulation of soil temperature from different treatments in 2018–2020.

| Treatment   | Measured value<br>(°C) | MBE<br>(°C) | RMSE<br>(%) | nRMSE<br>(%) | R <sup>2</sup> |
|-------------|------------------------|-------------|-------------|--------------|----------------|
| Calibration |                        |             |             |              |                |
| U1          | 26.76±1.31             | 0.22        | 3.37        | 12.88        | 0.81           |
| Validation  |                        |             |             |              |                |
| CK          | 26.88±1.09             | −0.15       | 3.71        | 13.07        | 0.77           |
| U3O1        | 26.66±1.30             | 1.30        | 3.75        | 12.89        | 0.79           |
| U1O1        | 26.54±1.15             | 1.22        | 3.46        | 13.05        | 0.75           |
| U1O3        | 26.74±1.18             | 0.11        | 3.55        | 12.99        | 0.81           |
| O1          | 26.51±1.29             | 1.56        | 3.67        | 12.81        | 0.76           |

Note: measured values, mean ± standard deviation.

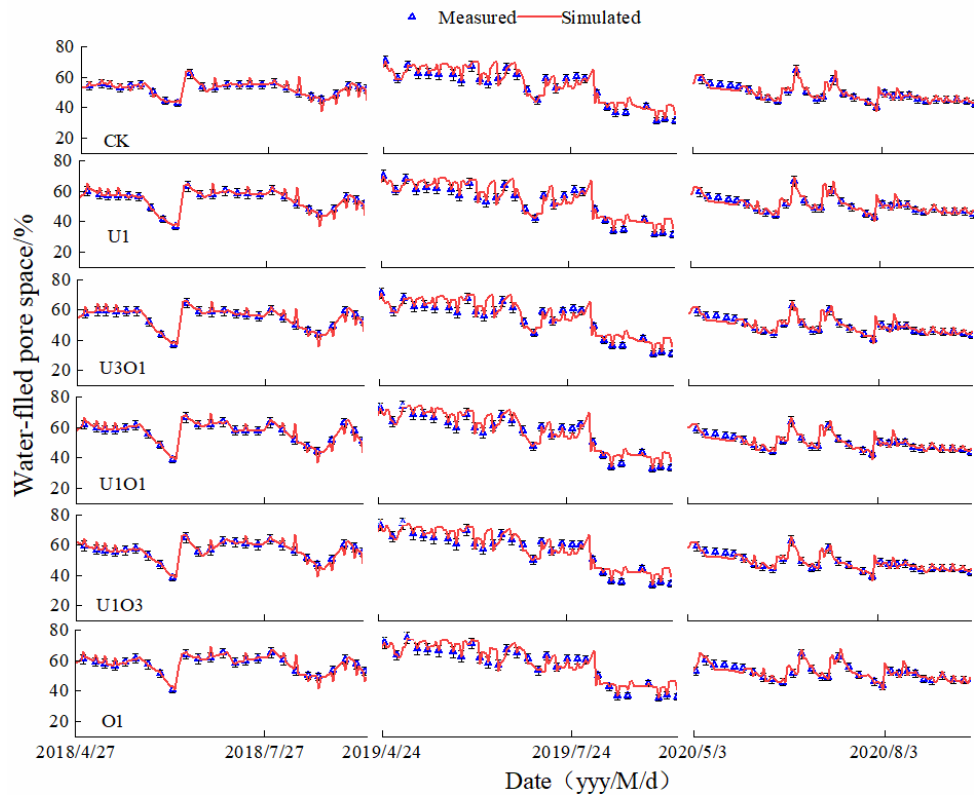

**Figure S2.** The modeled and measured soil WFPS under different treatments. Bars are the standard deviation of the measured values.

Table S2 Statistical evaluation of model simulation of WFPS from different treatments in 2018–2020.

| Treatment   | Measured value<br>(%) | MBE<br>(%) | RMSE<br>(%) | nRMSE<br>(%) | R <sup>2</sup> |
|-------------|-----------------------|------------|-------------|--------------|----------------|
| Calibration |                       |            |             |              |                |
| U1          | 55.51±3.21            | 0.95       | 4.28        | 8.32         | 0.78           |
| Validation  |                       |            |             |              |                |
| CK          | 52.01±4.19            | 1.12       | 4.15        | 8.69         | 0.79           |
| U3O1        | 53.16±3.09            | 1.37       | 4.83        | 8.98         | 0.80           |
| U1O1        | 53.69±2.84            | 1.09       | 4.30        | 8.44         | 0.83           |
| U1O3        | 54.02±4.45            | 1.01       | 4.51        | 8.51         | 0.84           |
| O1          | 54.19±3.01            | 1.56       | 4.66        | 8.41         | 0.84           |

Note: measured values, mean ± standard deviation.
